# Supplementary material for: Evolutionary history exposes radical diversification among classes of interaction partners of the MLLE domain of plant poly(A)-binding proteins
Source: PubMed Central journal article supplement (PMC4574140; doi:10.1186/s12862-015-0475-1), 2015-09-16

## Class A

Logo Number

Sequence

General

[A1]

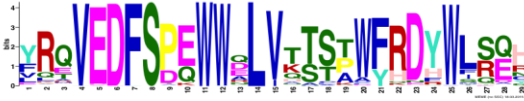

PAE1

[A2]

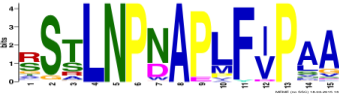

PAM2

[A3]

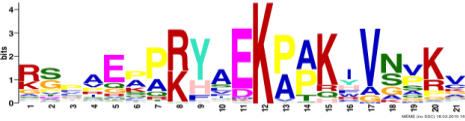

[A4]

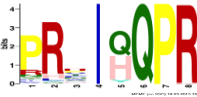

Subclass A1

[A5]

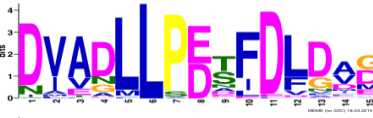

[A6]

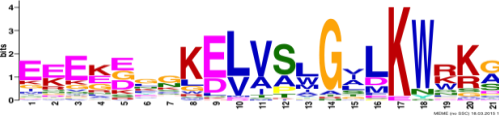

[A8]

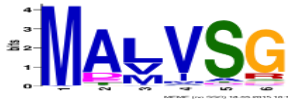

[A9]

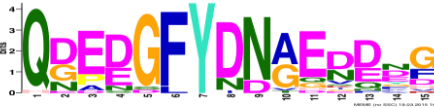

[A10]

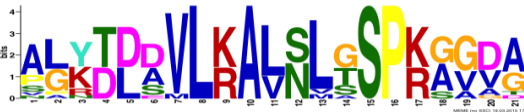

[A12]

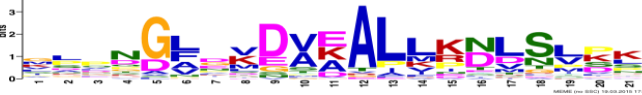

[A15]

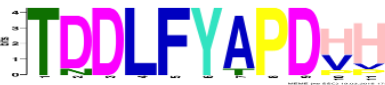

[A22]

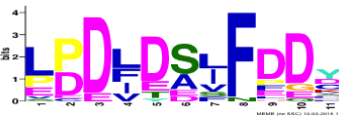

**Subclass A2**

[A7]

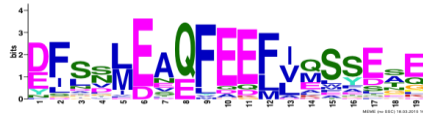

[A14]

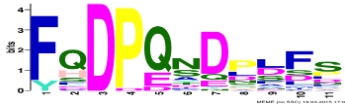

[A16]

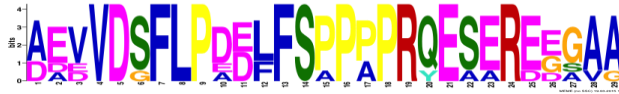

**Class C**

**General**

[C1]

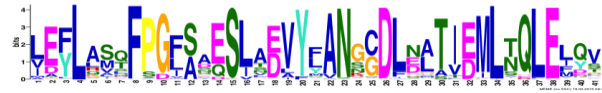

CUE

[C6]

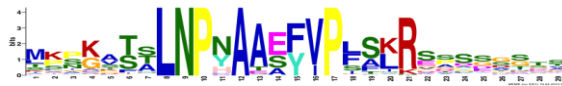

PAM2

[C8]

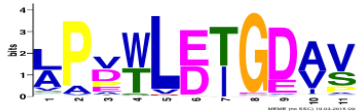

**Subclass C1**

[C2]

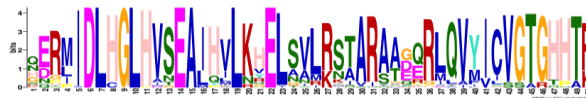

[C3]

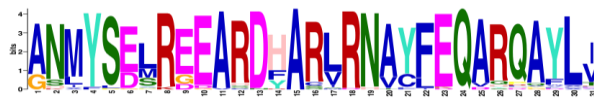

[C4]

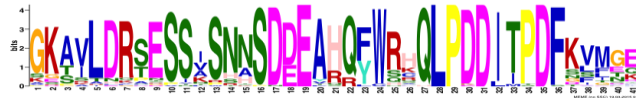

[C5]

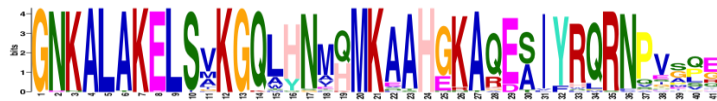

[C7]

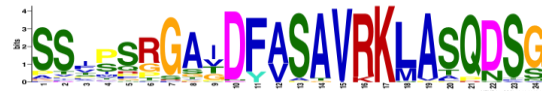

[C9]

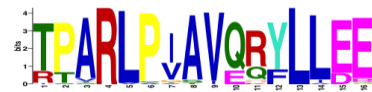

[C10]

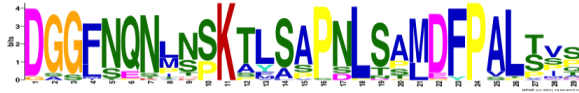

[C11]

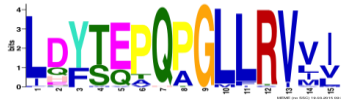

[C12]

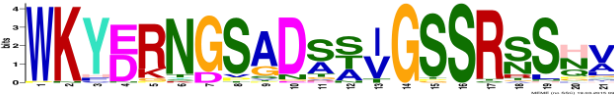

[C13]

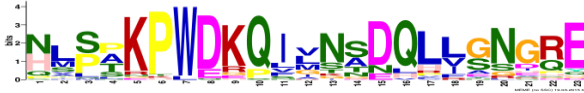

[C14]

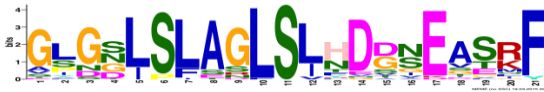

[C15]

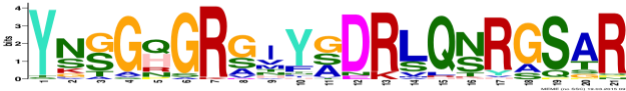

[C16]

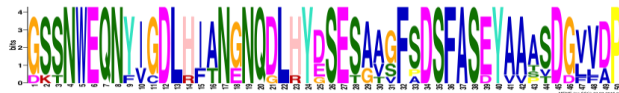

[C17]

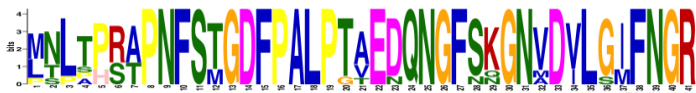

[C18]

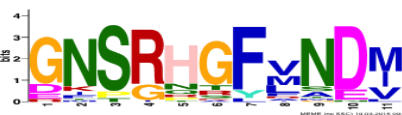

[C19]

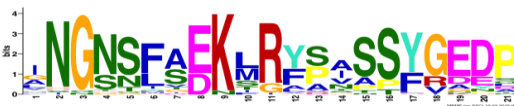

[C20]

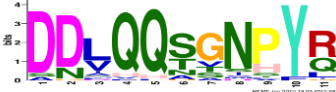

[C23]

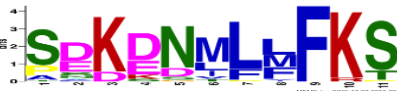

[C24]

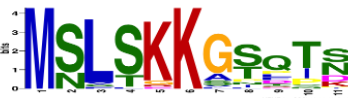

[C25]

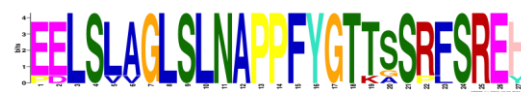

[C27]

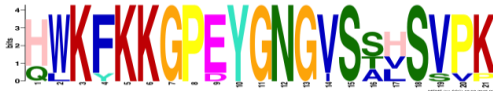

[C28]

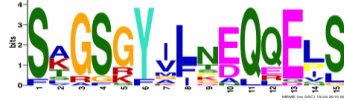

[C29]

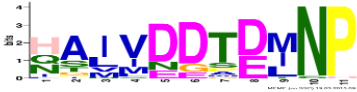

[C30]

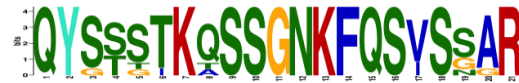

**Subclass C2**

[C21]

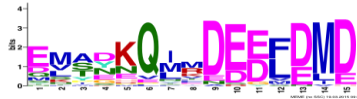

[C22]

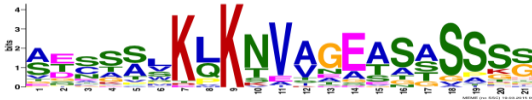

[C26]

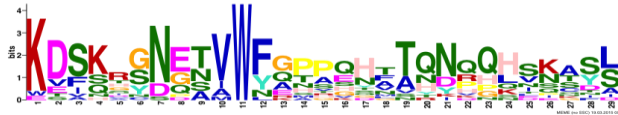

**Class D**

[D1]

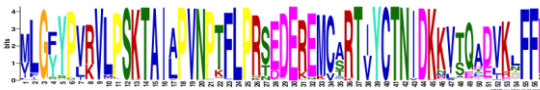

RRM1

[D2]

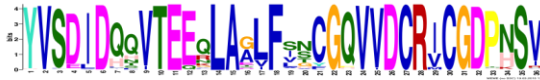

RRM2

[D3]

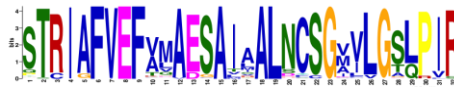

[D4]

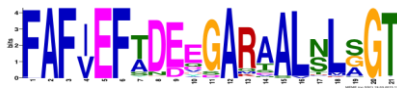

[D5]

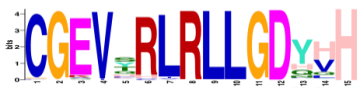

[D6]

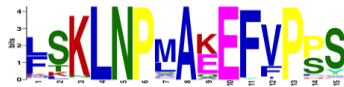

PAM2

[D7]

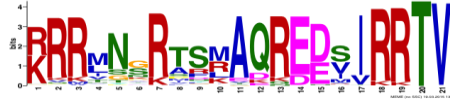

[D8]

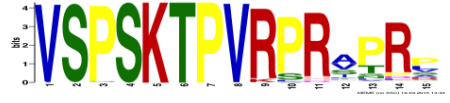

[D9]

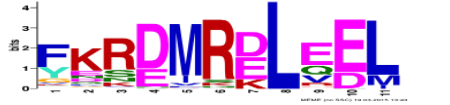

[D10]

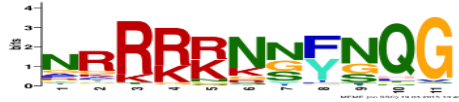

[D11]

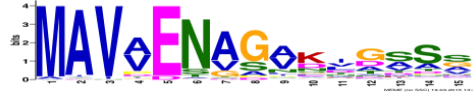

[D13]

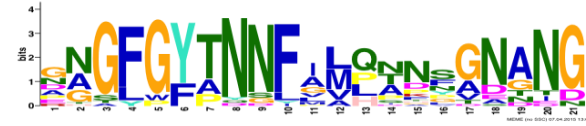

[D14]

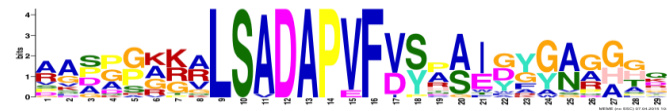

[D15]

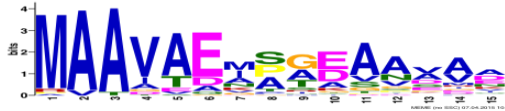

Supplement: 12862_2015_475_MOESM2_ESM.pdf [file 12862_2015_475_MOESM2_ESM.pdf]
