# Supplementary material for: Evolutionary history exposes radical diversification among classes of interaction partners of the MLLE domain of plant poly(A)-binding proteins
Source: PubMed Central journal article supplement (PMC4574140; doi:10.1186/s12862-015-0475-1), 2015-09-16
Supplement: 12862_2015_475_MOESM4_ESM.pdf [file 12862_2015_475_MOESM4_ESM.pdf]

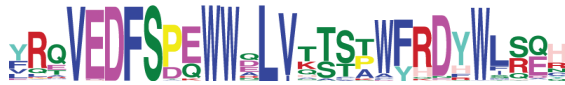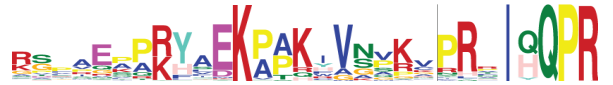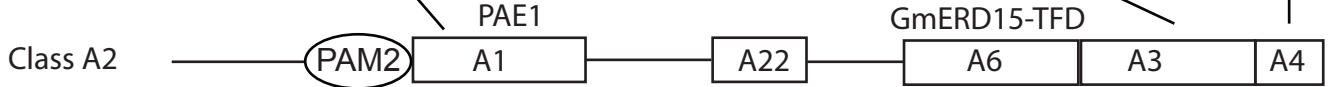

| Species | Sequence                                   | Sequence                    | Sequence        | Sequence                                          |
|---------|--------------------------------------------|-----------------------------|-----------------|---------------------------------------------------|
| stu     | Solanum tuberosum PGSC0003DMP400041390     | FSDPEAD                     | -----HDFS       | -----DTYD-SLLPDTDFIKQENKKEIITLGMLEWN--KSR         |
| sly     | Solanum lycopersicum Solyc06g050700.2.1    | FSDPDAD                     | -----NDFS       | -----HTYGCSELLPDTDFIKKEENKKEIITLGLLEWN--KSR       |
| mgu     | Mimulus guttatus mgv1a015167m              | FSDPQIESLFL                 | -----DITGGDD    | -----QVHGDSASAITFAFKGKEGNMMDLVALGWLKWR--KFR       |
| gmx     | Glycine max Glyma02g42860.1                | FQDPC                       | -----FQNDDAFFDD | -----FDLD--LQDEE--KERKEGKEVVSLGVLKWR--SCG         |
| gmx     | Glycine max Glyma14g05980.2                | FQDPC                       | -----FQYDDVFFDD | -----FDLD--LQDKE--NEGKEGKEVVSLGVLKWR--SCG         |
| pvu     | Phaseolus vulgaris Phvul.008G219700.1      | FQDPC                       | -----YQN-ELFFDD | -----FDLD--LEEEENEENEGEKEVVSLGVLKWR--SSG          |
| mtr     | Medicago truncatula Medtr5g083690.1        | FQDPC                       | -----YONDSFSDFE | -----MMDEDLFVHVEIPQHEHGKELMKLGSGLKWR--GSDI        |
| lus     | Linum usitatissimum Lus10040964            | YQDPCSDLSLPDD--LDFFDDG      | -----ADFLHFSGK  | -----DEDAKKE-----EEEEARLNWDVIVSGSMKWK--KQO        |
| lus     | Linum usitatissimum Lus10009847            | YQDPCSDLSLPDD--LDFFDDG      | -----ADFLHFSGK  | -----DEDAKKE-----EEEEARLNWDVIVSGSMKWK--KQO        |
| csi     | Citrus sinensis orangel.lg032323m          | YFDPCSDPLFSD--FDD           | -----LVLPDVDEI  | -----FDPKHQE--EIERDFCKDLVSLGTLKWK--KGG            |
| ccl     | Citrus clementina Ciclevl10033013m         | YFDPCSDPLFSD--FDD           | -----LVLPDVDEI  | -----FDPKHQE--EMERDFCKDLVSLGTLKWK--KGG            |
| pop     | Populus trichocarpa Potri.010G182800.1     | FHDPEAEPLFS--DICDFVLS       | -----DLDSLFFDDP | -----IYDTIKG--EVELKGNKELVSLGVLKWK--MDR            |
| pop     | Populus trichocarpa Potri.008G074600.1     | FYDPESDPSFS--DIYDFLPL       | -----DLYSLFFDDP | -----IYDTIKGKCREHEEVEKGNKELVSLGVMKWK--KGR         |
| rcu     | Ricinus communis 29729.m002310             | FQDPCSDALMN--DPYDLALP       | -----DLDSFFLDDL | -----IGDTRVN--PRDEEEKG--KELVIRGMKWK--KGR          |
| mes     | Manihot esculenta cassava4.1_019051m       | FQDPCDLSLN--DVCD            | -----FDSLFFDSG  | -----VEDTAAE-----EEEHS--KDLVSMGLMKWK--KGR         |
| cpa     | Carica papaya evm.model.supercontig_19.111 | FQDPCNDP-FS--DIYDPVLPDFDALF | -----EDDDVFFENM | -----EMELRGTPKVABEEEEVEMRKQLVAAAGALKWK--KDR       |
| egr     | Eucalyptus grandis Eucgr.G03104.1          | FCDPQDDPLFSAAG--DDDDLALP    | -----DLDSLFDCCD | -----QALADQG--KEEWSGYCGDLVSIIGLKWK--EAR           |
| vvi     | Vitis vinifera GSVIVT01032732001           | FQDPEFDPYC--YDIDPALP        | -----DIDALFDCT  | -----GSKAEER--KEHQR--ELVSLGALKWR--KTR             |
| mdu     | Malus domestica MDP0000307941              | FQDPCNDPSFS--DIHDPALLS      | -----VDALFDVE   | -----NIHHSRNTG-AAEEEEKDKKELVSLGLLKWR--KGR         |
| mdu     | Malus domestica MDP0000563240              | FQDPCNDGAYP--DILDPDLLP      | -----IDALFDVE   | -----NHHSPRTQPAVEEQEKDLKELASLGLLKWR--KGR          |
| ppe     | Prunus persica ppa012915m                  | FQDPCNDPFS--DINDPALPD       | -----VDALFDVH   | -----YNNNTQAQOEHEEEDKDFHKELVSMGLLKWR--KGR         |
| fve     | Fragaria vesca mrna21290.1-v1.0-hybrid     | FHDPCNDPFS--DVNDAAFLDSD     | -----YVDDLFDQH  | -----YPTADNKKVEAEEEEKDYHKELVSLGLLKWP--KGR         |
| gra     | Gossypium raimondii Gorai.012G079800.1     | FHDPCND--DADLLFPDD          | -----LDVDFDDYD  | -----EFFFDPTCE--GKEEDTQKELVPVGFAPKWR--KGR         |
| tca     | Theobroma cacao ThecclEG042419t1           | FHDPCND--DDSLFFPDD          | -----LDAIFDEYD  | -----DFSAYSRC--EKEGDGDKELVPIGALKWR--KGR           |
| gra     | Gossypium raimondii Gorai.013G015700.1     | FHDPCNDVSD--DDDLFPDD        | -----LDDIFDEYD  | -----DVLLDRPE--EKE--KKLVPPGTSKWR--KDR             |
| csa     | Cucumis sativus Cucsa.136830.1             | FQDPCNELSFG--ENE-EFILPD     | -----LESFFDDFT  | -----RQQ-----EEEELEFSKDLVPMGAFKWKARSG             |
| aco     | Aquilegia coerulea Aquca.005_00211.1       | FEDPETNLDFD--QYDDPILLP      | -----VESVFHDYS  | -----TKDF-----EEEEKDYKELVSMGALKYKRSRG             |
| atr     | Amborella trichopoda scaffold00023.50      | QDDFIAEDDFMAQDNFSACEEELDLP  | -----EIDSVFDGHK | -----GVEEGKG--MKNEMKELATMASLKYE--RSQ              |
| spo     | Spirodela polyrrhiza v2 Spipo23G0042900    | FLEEAARDGAG--FIDEEEGS       | -----SLPEIYDIFE | -----GYQQQGE--DGEKGRGRELVSWSGAEKWR--GM            |
| sbi     | Sorghum bicolor vl.4 Sb09g015910.1         | GALGLLD--AEDLDLDAEVDGF      | -----LPDDFFSAPA | -----PROESEREQVAGAGKKVGGG--LEVAANGIDKWW--RAH      |
| zma     | Zea mays GRMZM2G093325_T02                 | GALGLLD--AEDLDLDD-DVDSF     | -----LPDDFFSPPA | -----PRYESERED--AGRRRAGRG--LEVAANGIDRWW--RAH      |
| pvi     | Panicum virgatum v0.0 Pavirv00017628m      | GALGLLD--DEGGPDEDAEVVDSF    | -----LPDELFSPPP | -----PROEAERDGG--AGKRRGGSGGLEVAANGIDKWW--RAH      |
| pha     | Panicum hallii v0.5 Pahal.0150s0007.1      | GALGLLD--DEGGPDEDAEVVDSF    | -----LPDELFSPPP | -----PROESEREQ--AGKRRGGSGGLEVAANGIDKWW--RAH       |
| pvi     | Panicum virgatum v0.0 Pavirv00057401m      | GALGLLD--ADEDAEVVDSF        | -----LPDELFSPPP | -----PROESAREEG--AGKRRGGSGGLEVAANGIDKWW--RAH      |
| sit     | Setaria italica Si023506m                  | GALGLLD--ADEDAEVVDSF        | -----LPADLFSPPP | -----PROESAREES--AGKRRGGG--LEVAANGIDKWW--RAH      |
| osa     | Oryza sativa LOC_Os05g27780.1              | SALGLLD--DNDNGDGYDLEGFL     | -----LPDDLFSSTP | -----ILVGEPADEKEGKFGGAGGKKVGGGSAEVVAANGIDKWW--RAH |
| bdi     | Brachypodium distachyon Bradi1g11710.1     | GDGLLD--DADD                | -----           | -----AHEGDGRKEVAAGK--EGGGVEVAPWGIEKWW--RAH        |
