# Supplementary material for: Evolutionary history exposes radical diversification among classes of interaction partners of the MLLE domain of plant poly(A)-binding proteins
Source: PubMed Central journal article supplement (PMC4574140; doi:10.1186/s12862-015-0475-1), 2015-09-16
Supplement: 12862_2015_475_MOESM5_ESM.pdf [file 12862_2015_475_MOESM5_ESM.pdf]

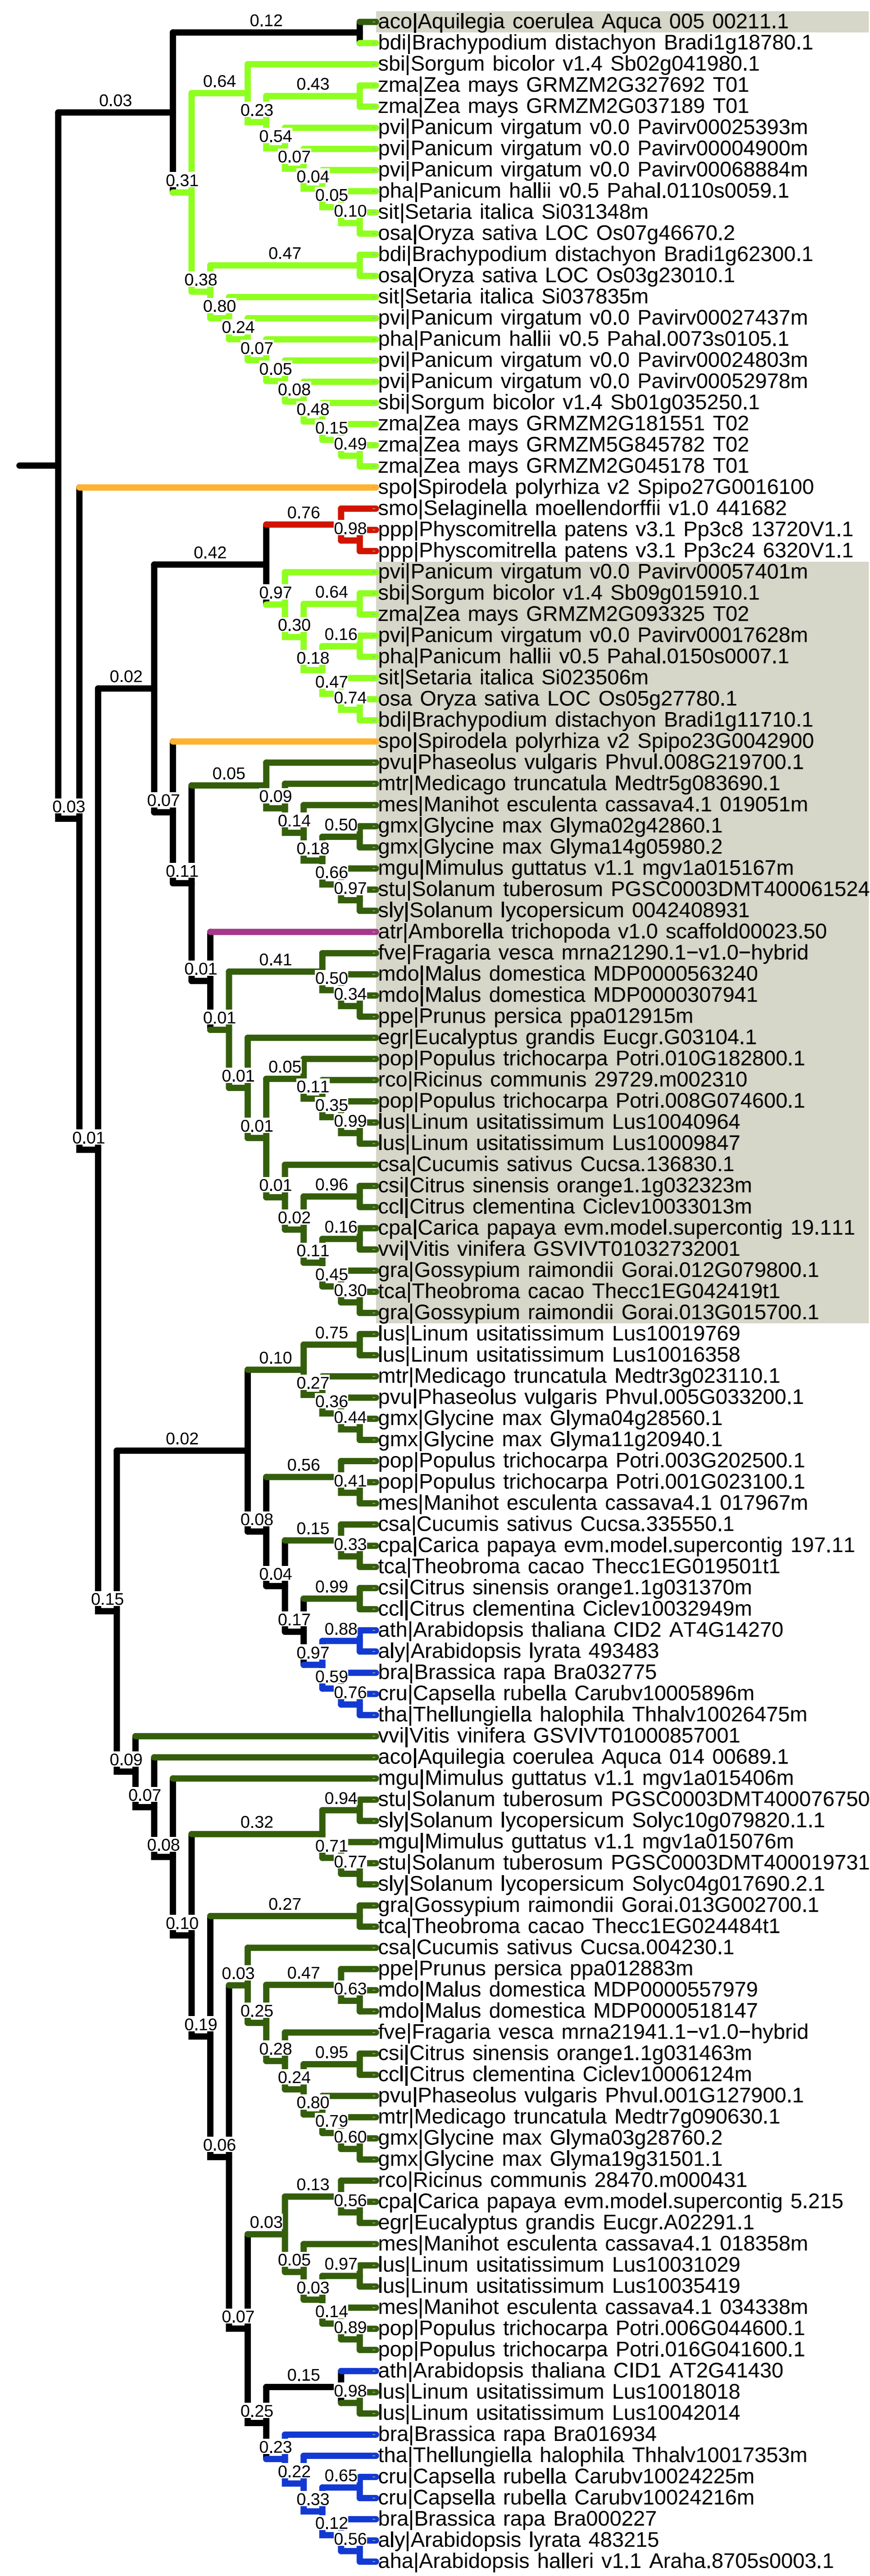

complete sequence

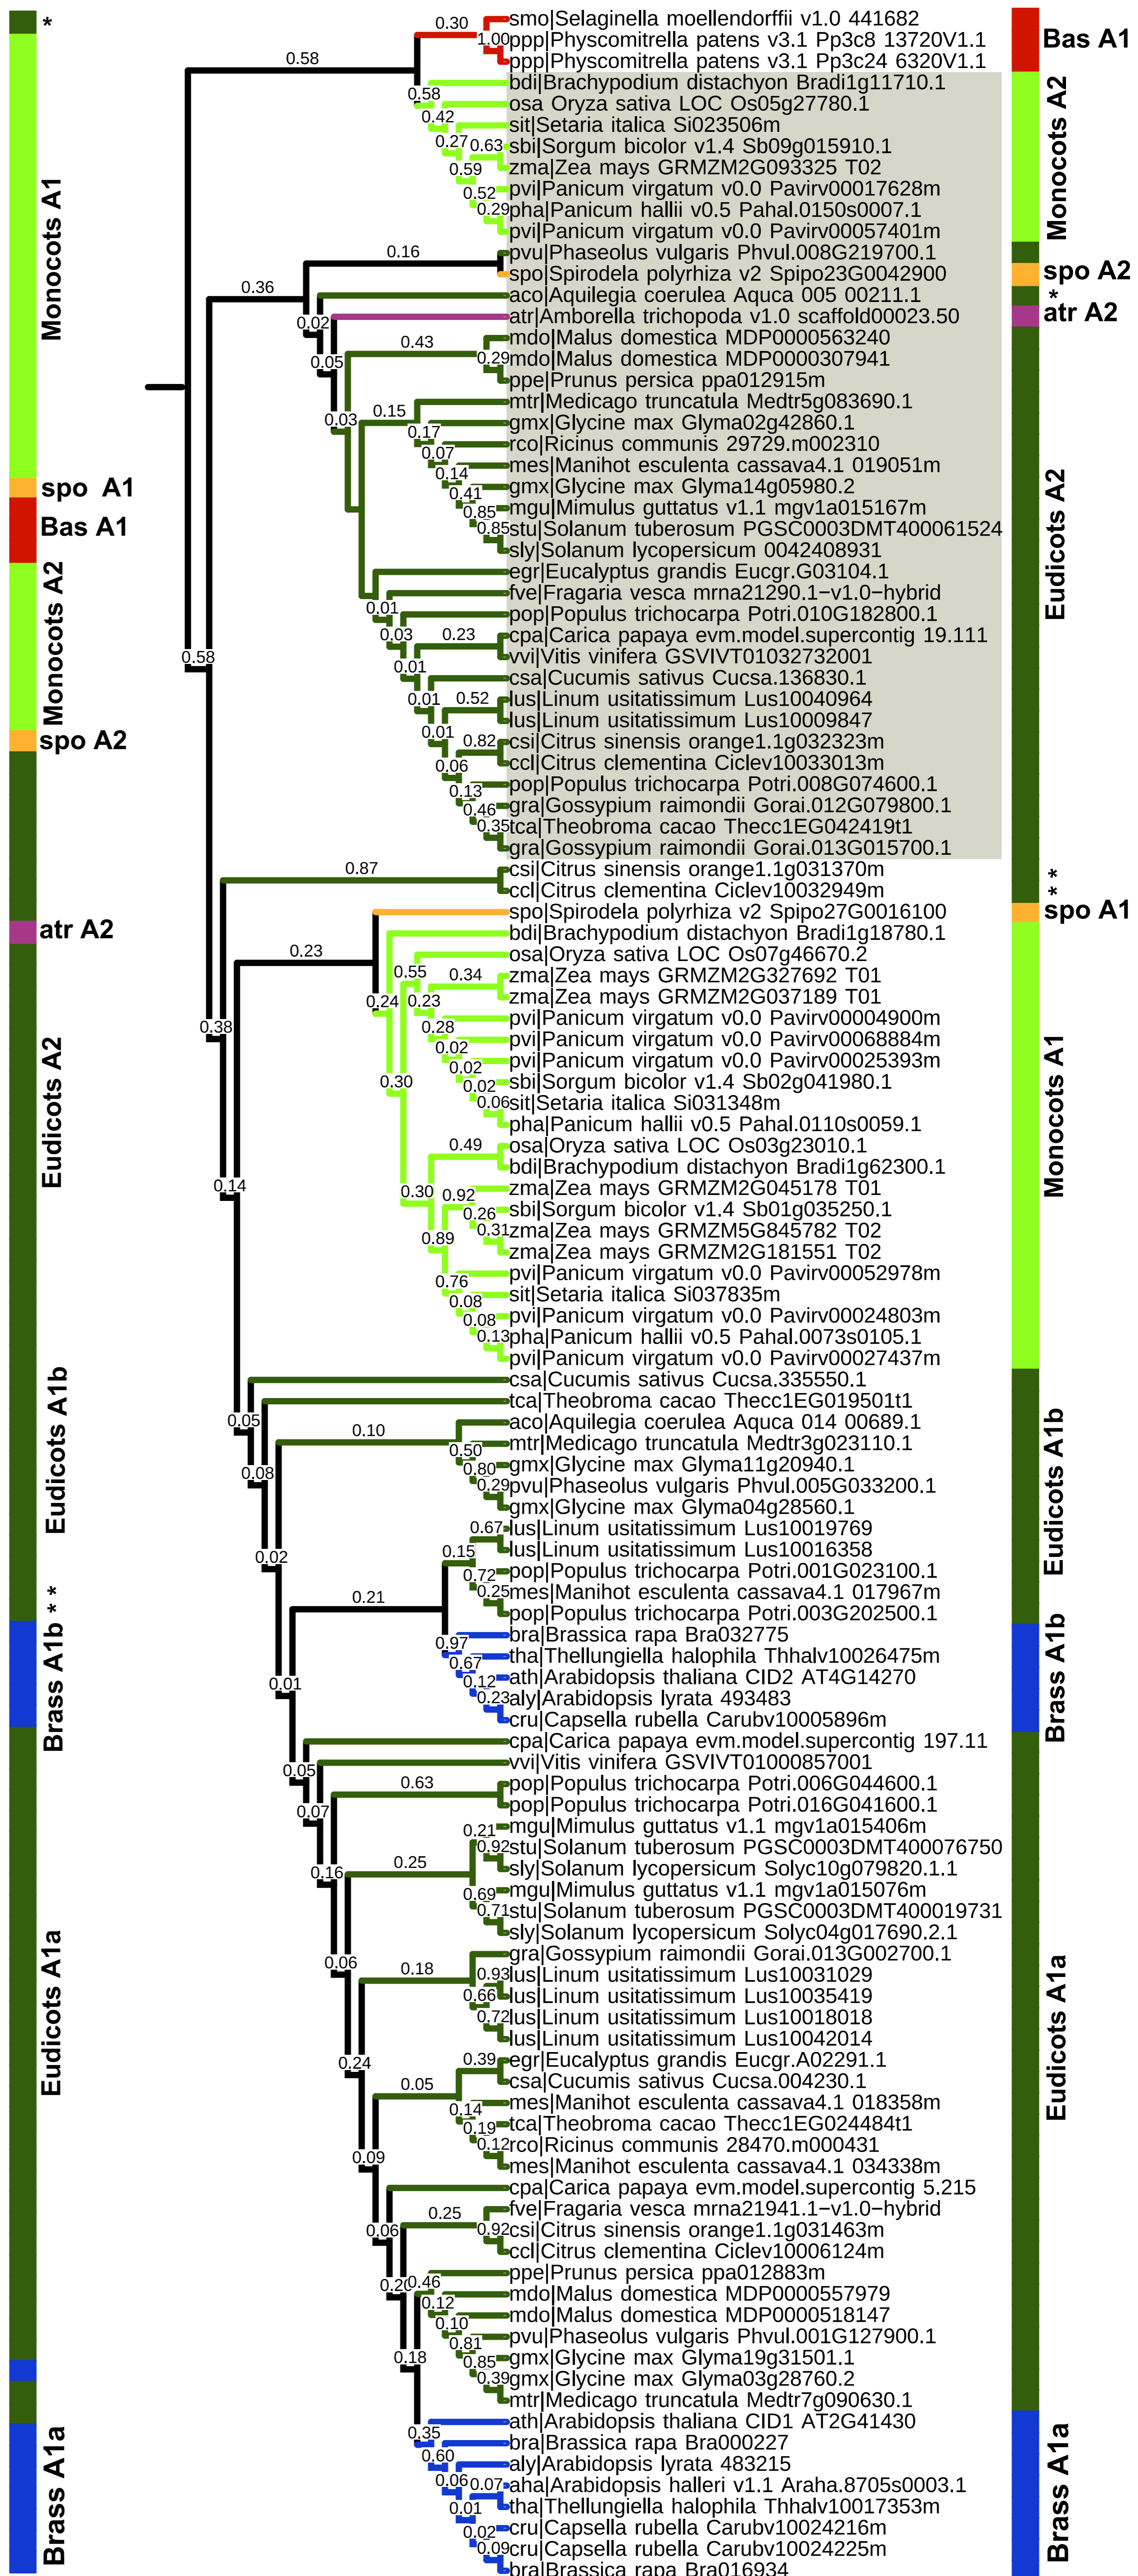

PAE1 LOGO
