# Supplementary material for: Evolutionary history exposes radical diversification among classes of interaction partners of the MLLE domain of plant poly(A)-binding proteins
Source: PubMed Central journal article supplement (PMC4574140; doi:10.1186/s12862-015-0475-1), 2015-09-16
Supplement: 12862_2015_475_MOESM9_ESM.pdf [file 12862_2015_475_MOESM9_ESM.pdf]

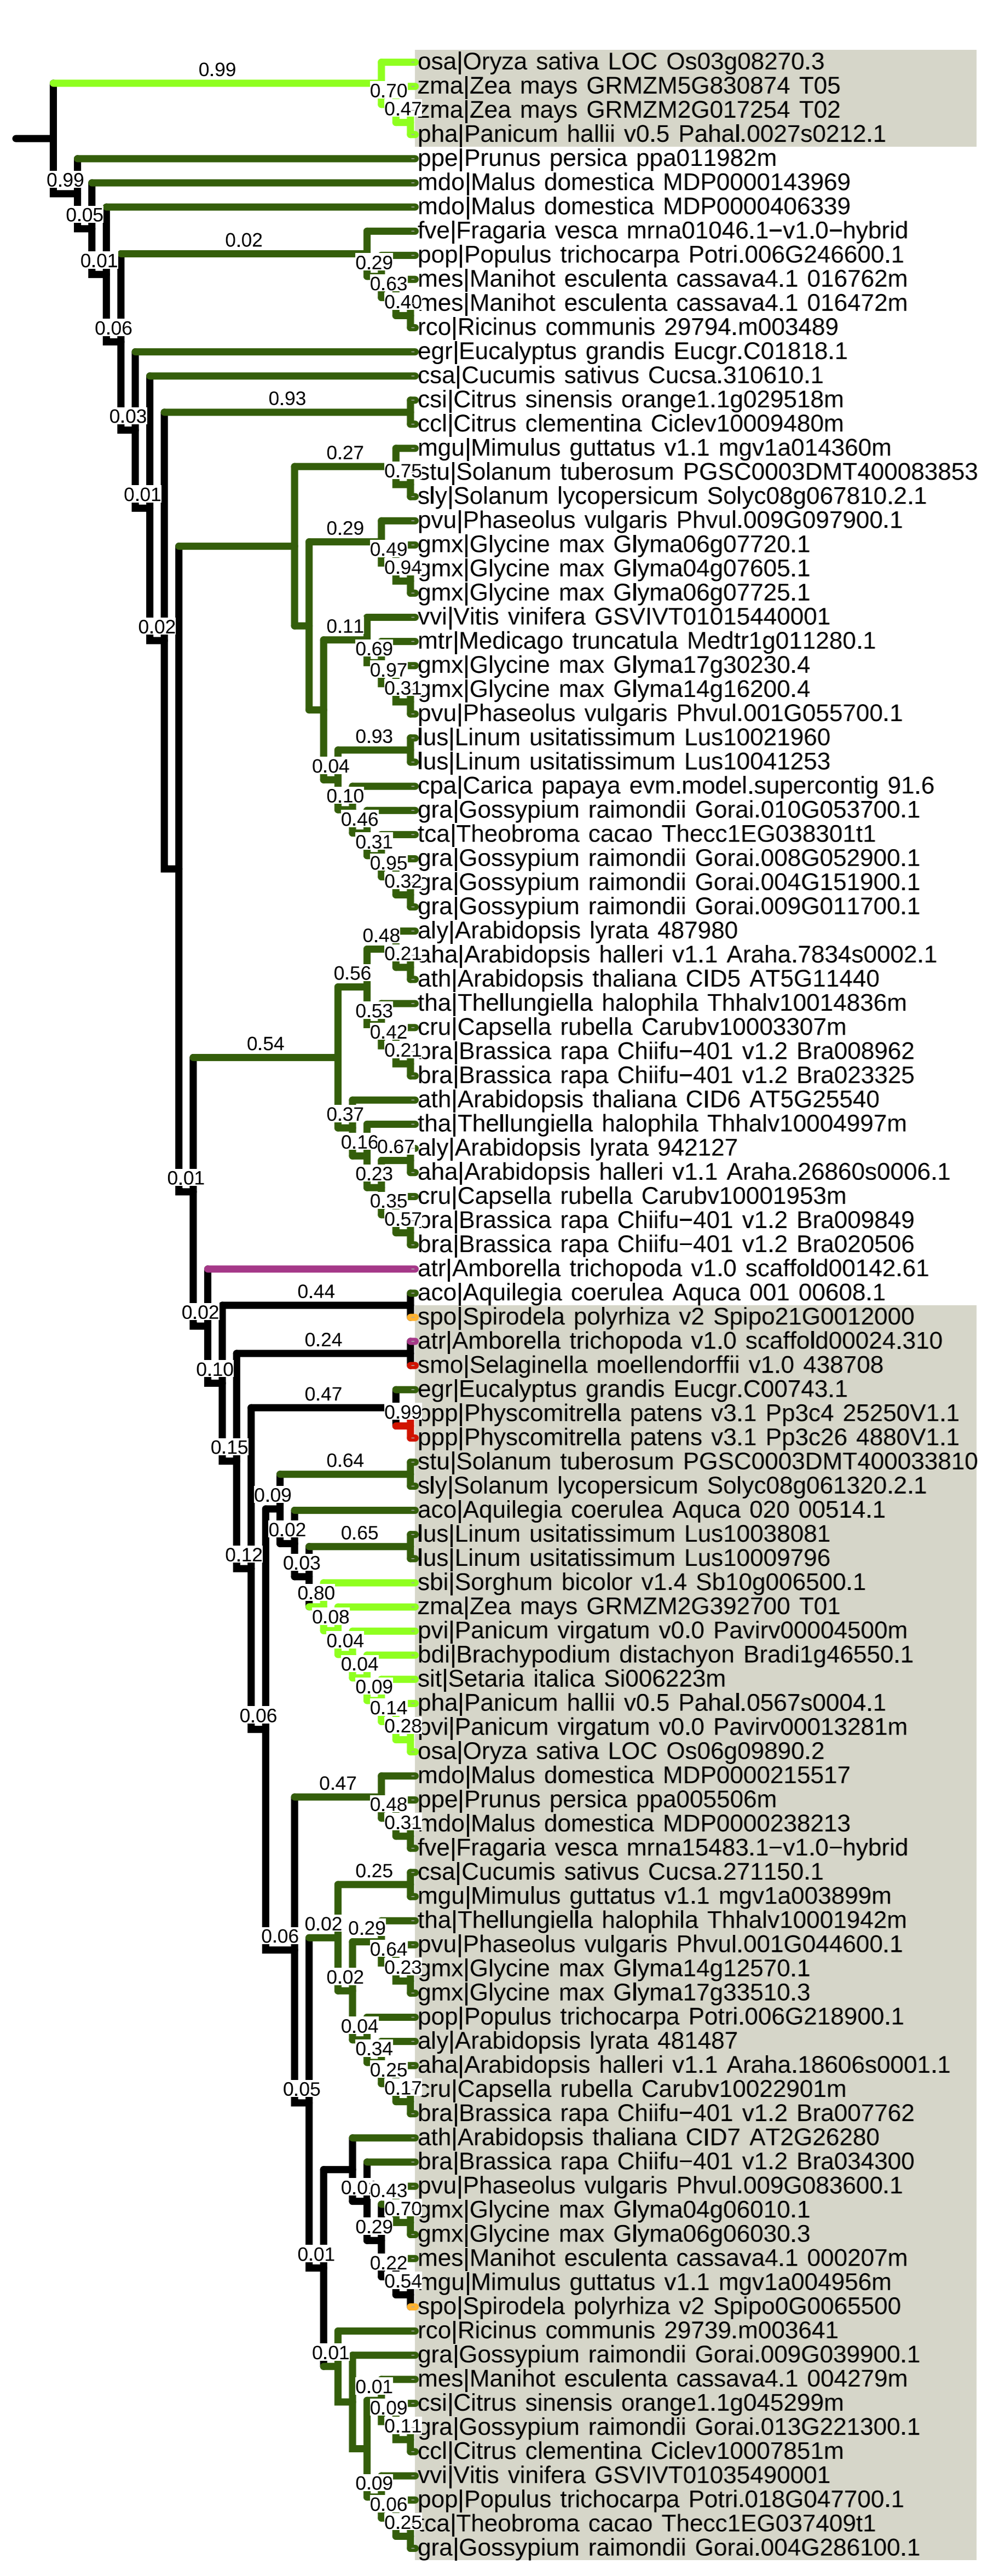

complete sequence

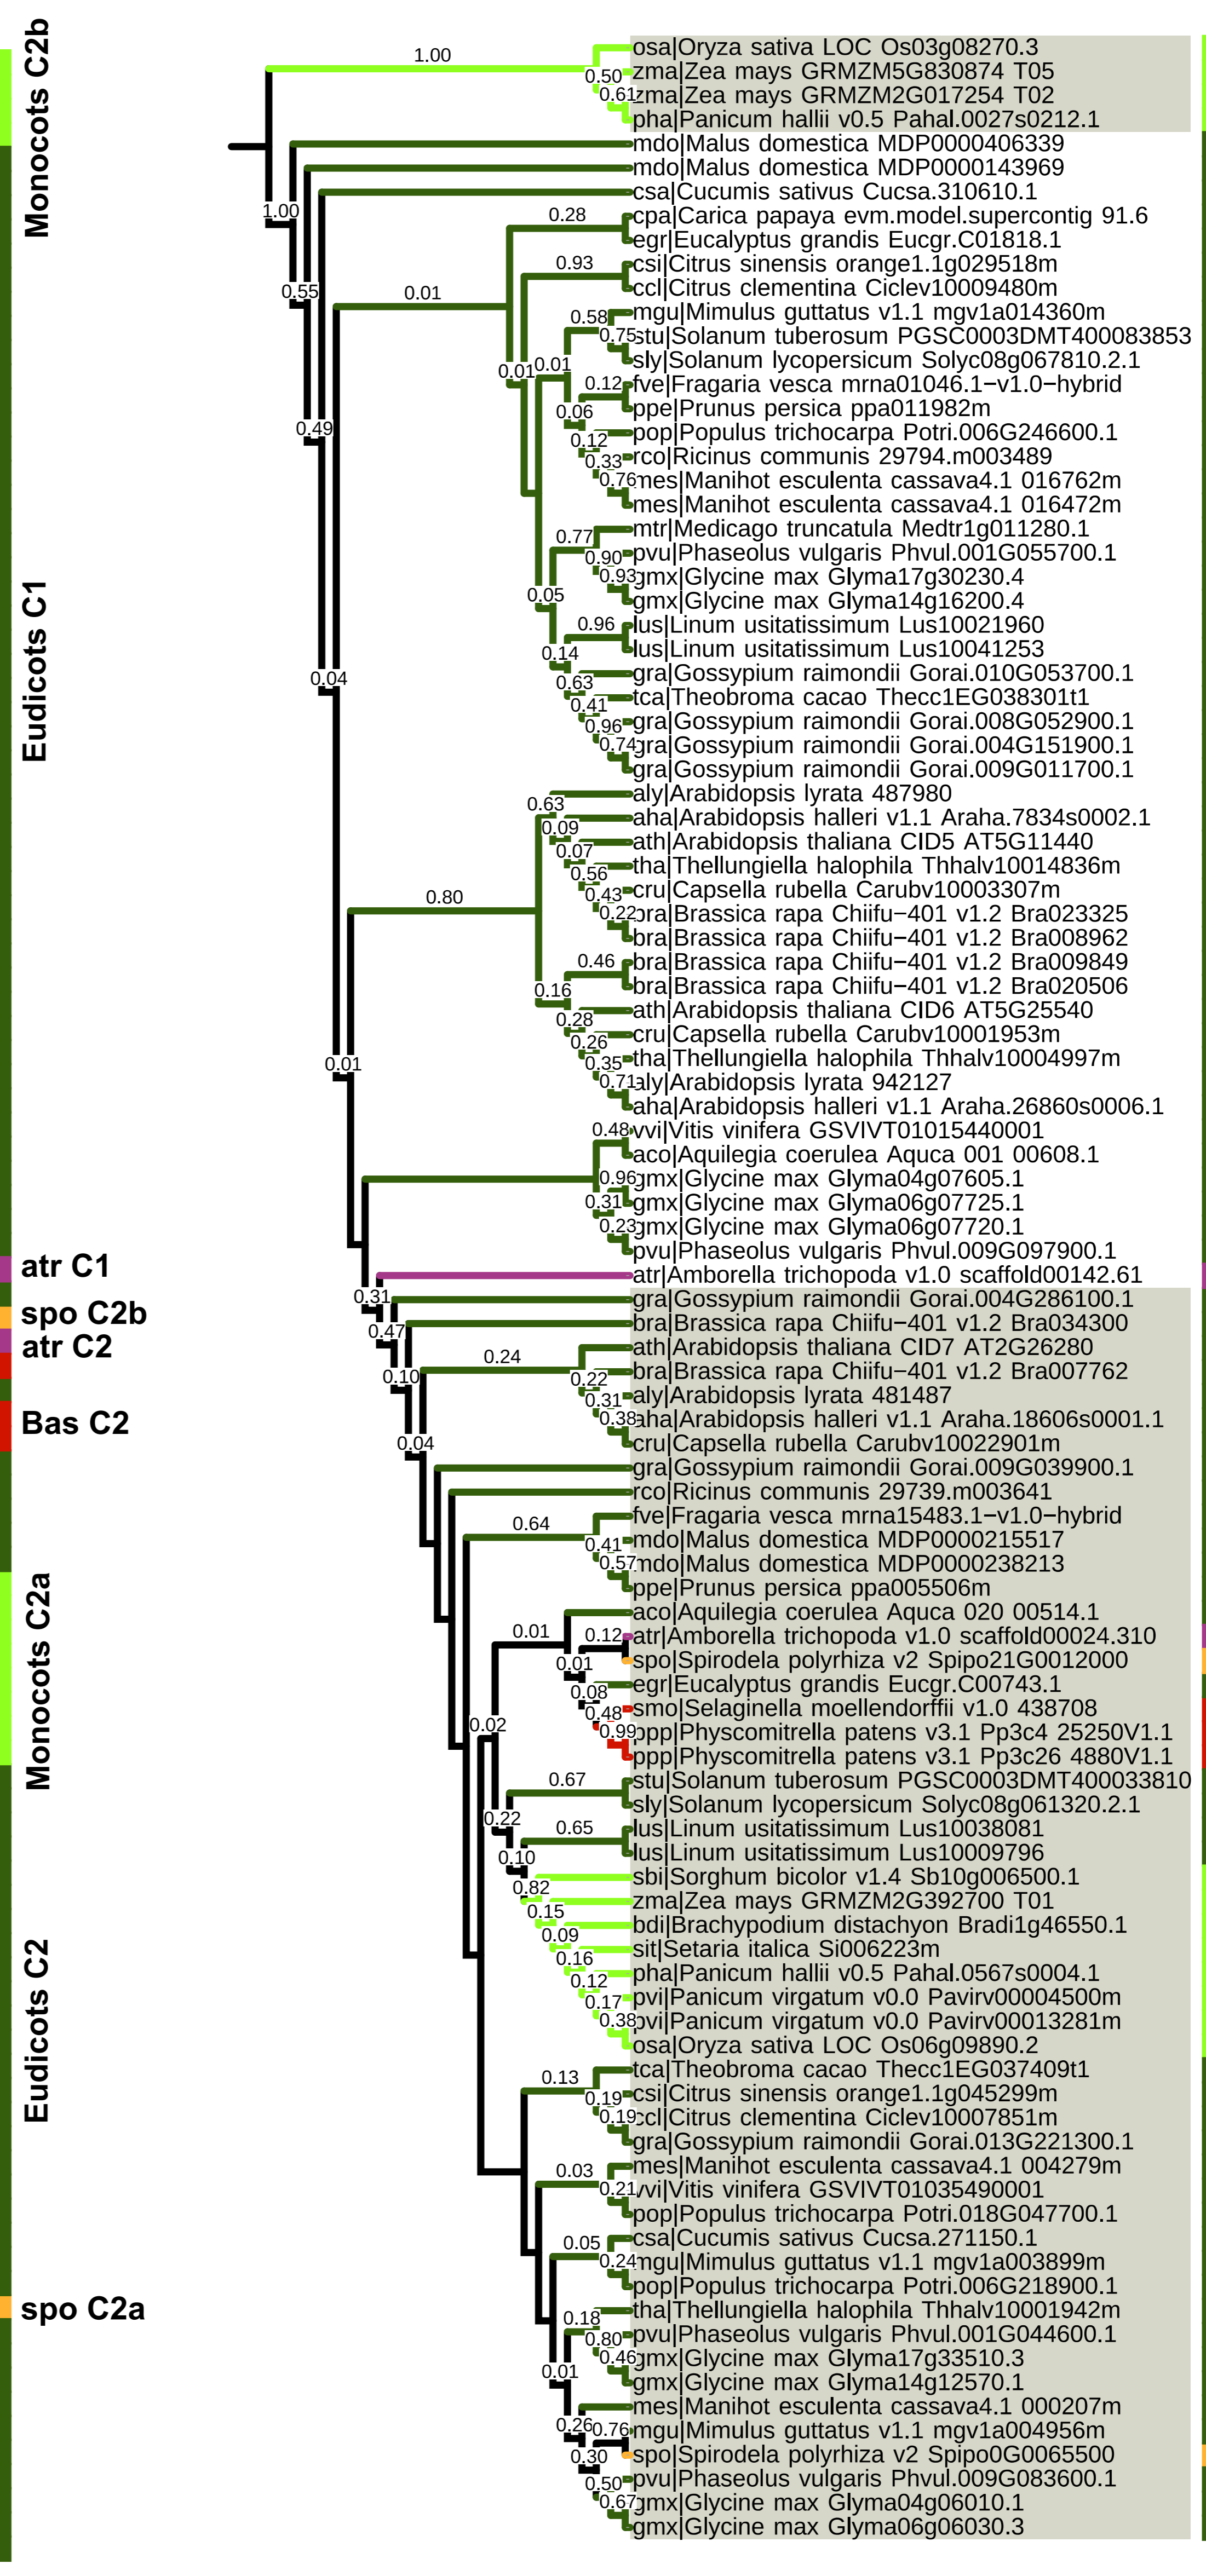

CUE LOGO

Monocots C2b

Eudicots C1

atr C1  
spo C2b  
atr C2  
Bas C2

Monocots C2a

Eudicots C2

spo C2a

Monocots C2b

Eudicots C1

atr C1  
spo C2b  
atr C2  
Bas C2

Monocots C2a

Eudicots C2

spo C2a
