# Supplementary material for: Evolutionary history exposes radical diversification among classes of interaction partners of the MLLE domain of plant poly(A)-binding proteins
Source: BMC Evol Biol. 2015 Sep 16;15:195. doi: 10.1186/s12862-015-0475-1 (PMC4574140; doi:10.1186/s12862-015-0475-1)
Supplement: Additional file 3: — Alignment of the CID A1 proteins. Domain architecture is represented at the top, including PAM2 and GmERD15-TFD, and the numbers of the sequence LOGOs that mapped to CID A2 proteins. The primary sequence for each LOGO is shown. Sequence alignment was obtained using ClustalX 2.0.12 software, and a default color code was applied. The locations of regions encompassing LOGO #A5, LOGO #A7, and LOGO #A10 are enclosed by rectangles. (PDF 6840 kb) [file 12862_2015_475_MOESM3_ESM.pdf]

Y R Q V E D F S P E W W L V T S T W F R D Y L S Q R E D

R S E P R Y E K P A K V N K P R Q Q P R

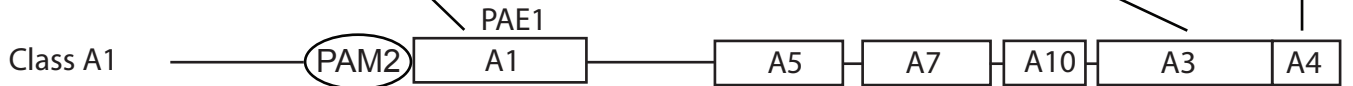

D V A D L P E F D L D S

P E L E A Q E E F L S S E E

A L Y T P R V L K A L S L S P K G G D A R A Y X G

|      |                                            |                  |            |                                   |                                                      |                       |               |
|------|--------------------------------------------|------------------|------------|-----------------------------------|------------------------------------------------------|-----------------------|---------------|
| ath  | Arabidopsis thaliana CID2_AT4G14270        | GGDDFSVMEEFE     | EMIASDDG   | GSMADTVTEADVASYLKMLLNIAESTKEK     | IYRS                                                 |                       |               |
| aly  | Arabidopsis lyrata 493483                  | GGDDFSVMEEFE     | EMIASDDG   | GSMADTVTEADVASYLKMLLNIAESTKEK     | IYRA                                                 |                       |               |
| cru  | Capsella rubella Carubv10005896m           | GGDDFSVMEEFE     | EMIASDDG   | GSTVDSVTEADVASYLKMLLNIAESTKEK     | RSKM                                                 |                       |               |
| bra  | Brassica rapa Bra032775                    | ---DMEDEF---     | ELILTSSG   | ENEMGSSSVRESVDGRYLLKMLLNIAESTKEK  | IYRS                                                 |                       |               |
| tha  | Thellungiella halophila Thhalv10026475m    | ---DMEDEF---     | ELIMSSSEK  | EAEIGGSTVTEADVASYLKMLLNIAESTKEK   | IYRS                                                 |                       |               |
| →ppp | Physcomitrella patens vl.6 Ppls184_126V6.1 | FEADLEIADLDE     | FLEFOEQEQ  | EMETAOESLNFDVDDGCIDDDLSLFNINQIRDL | KLNF                                                 |                       |               |
| →ppp | Physcomitrella patens vl.6 Ppls387_21V6.1  | FEADLEIADLDDN    | FLELQEQE   | EQAAAASLYFDDHRLLEDLDSVINNVQIMDV   | KVNH                                                 |                       |               |
| →smo | Selaginella moellendorffii 441682          | PE-DLEALE        | MELMEEEE   | EMEFLE                            | NSEN                                                 |                       |               |
| cpa  | Carica papaya evm.model.supercontig_197.11 | FEGEGDDVETQFE    | ELVMWFEE   | DATGSVN                           | VDAAVQKGGLLDECELIR                                   | SCKD                  |               |
| aly  | Arabidopsis lyrata 483215                  | GGGQVADVADLLPE   | SFDFDDME   | DFDIDATEFDQG                      | FDGRMYQAPSEFGFGKNG                                   | EMVRKSTGNNR           |               |
| aha  | Arabidopsis halleri vl.1 Araha.8705s0003.1 | GGGQVADVADLLPE   | SFDFDDME   | DFDIDATEFDQG                      | FDGRMYQAPSEFGFGKNG                                   | EMVRKSTGNNR           |               |
| ath  | Arabidopsis thaliana CID1_AT2G41430        | GGGHIDVADLLPE    | SFDFDDME   | DFDIDATEFDQG                      | FDGRMYQAPSEFGFGKNG                                   | EMVRKSTGNNR           |               |
| cru  | Capsella rubella Carubv10024225m           | GGGQVADVADLLPE   | SFDFDDME   | DFDIDATEFDQG                      | FDGRMYQAPSEFGFGKNG                                   | EMVRKSTGNNR           |               |
| cru  | Capsella rubella Carubv10024216m           | GGGQVADVADLLPE   | SFDFDDME   | DFDIDATEFDQG                      | FDGRMYQAPSEFGFGKNG                                   | EMVRKSTGNNR           |               |
| tha  | Thellungiella halophila Thhalv10017353m    | RGGEVADVADLLPE   | SFDFDDME   | DFDIDATEFDHG                      | YGGQIY                                               | HAPSDFLGLKNG          | EMVRKSTGNNR   |
| bra  | Brassica rapa Bra016934                    | ---EVADVADLLPE   | SFDFDDME   | DFDIDATEFDHG                      | YGGQIY                                               | HAPSDFLGLKNG          | EMVRKSTGNNR   |
| bra  | Brassica rapa Bra000227                    | ---EVADVADLLPE   | SFDFDDME   | DFDIDATEFDHG                      | YGGQIY                                               | HAPSDFLGLKNG          | EMVRKSTGNNR   |
| mes  | Manihot esculenta cassava4.1_034338m       | FDGSDVADVADLLPD  | AFEDFDAGE  | DFSSP                             | EVQFQEFVESYDTE                                       | VENKSPSNGML           | QNGFQMEAE     |
| mes  | Manihot esculenta cassava4.1_018358m       | FDGSDVADVADLLPD  | AFEDFDAGE  | DFSSP                             | EVQFQEFVESYDTE                                       | VENKSPSNGML           | QNGFQMEAE     |
| pop  | Populus trichocarpa Potri.006G044600.1     | FDGSDVADVADLLPD  | AFEDFDAGE  | DFSSP                             | EVQFQEFVESYDTE                                       | VENKSPSNGML           | QNGFQMEAE     |
| pop  | Populus trichocarpa Potri.016G041600.1     | LDGSDVADVADLLPD  | AFEDFDAGE  | DFSSP                             | EVQFQEFVESYDTE                                       | VENKSPSNGML           | QNGFQMEAE     |
| rcu  | Ricinus communis 28470.m000431             | FDGSDVADVADLLPD  | AFEDFDAGE  | DFSSP                             | EVQFQEFVESYDTE                                       | VENKSPSNGML           | QNGFQMEAE     |
| lus  | Linum usitatissimum Lus10031029            | FDTSDVADVADLLPD  | AFEDFDAGE  | DFSSP                             | EVQFQEFVESYDTE                                       | VENKSPSNGML           | QNGFQMEAE     |
| lus  | Linum usitatissimum Lus10035419            | FDTSDVADVADLLPD  | AFEDFDAGE  | DFSSP                             | EVQFQEFVESYDTE                                       | VENKSPSNGML           | QNGFQMEAE     |
| lus  | Linum usitatissimum Lus10018018            | LDSKDIADVADLLPD  | AFEDFDAGE  | DFSSP                             | EVQFQEFVESYDTE                                       | VENKSPSNGML           | QNGFQMEAE     |
| lus  | Linum usitatissimum Lus10042014            | LDSKDIADVADLLPD  | AFEDFDAGE  | DFSSP                             | EVQFQEFVESYDTE                                       | VENKSPSNGML           | QNGFQMEAE     |
| gmx  | Glycine max Glyma03g28760.2                | FDGSDVADVADLLPD  | AFEDFDAGE  | DFSSP                             | EVQFQEFVESYDTE                                       | VENKSPSNGML           | QNGFQMEAE     |
| gmx  | Glycine max Glyma19g31501.1                | FDGSDVADVADLLPD  | AFEDFDAGE  | DFSSP                             | EVQFQEFVESYDTE                                       | VENKSPSNGML           | QNGFQMEAE     |
| pvu  | Phaseolus vulgaris Phvul.001G127900.1      | FDGSDVADVADLLPD  | AFEDFDAGE  | DFSSP                             | EVQFQEFVESYDTE                                       | VENKSPSNGML           | QNGFQMEAE     |
| mtr  | Medicago truncatula Medtr7g090630.1        | FDGSDVADVADLLPD  | AFEDFDAGE  | DFSSP                             | EVQFQEFVESYDTE                                       | VENKSPSNGML           | QNGFQMEAE     |
| gra  | Gossypium raimondii Gorai.013G002700.1     | FDVSDVADVADLLPD  | AFEDFDAGE  | DFSSP                             | EVQFQEFVESYDTE                                       | VENKSPSNGML           | QNGFQMEAE     |
| tca  | Theobroma cacao Thecc1EG024484t1           | FDGSDVADVADLLPD  | AFEDFDAGE  | DFSSP                             | EVQFQEFVESYDTE                                       | VENKSPSNGML           | QNGFQMEAE     |
| cpa  | Carica papaya evm.model.supercontig_5.215  | LDSKDIADVADLLPD  | AFEDFDAGE  | DFSSP                             | EVQFQEFVESYDTE                                       | VENKSPSNGML           | QNGFQMEAE     |
| egr  | Eucalyptus grandis Eucgr.A02291.1          | LHGSDVADVADLLPD  | AFEDFDAGE  | DFSSP                             | EVQFQEFVESYDTE                                       | VENKSPSNGML           | QNGFQMEAE     |
| mdo  | Malus domestica MDP0000557979              | VDN---VADLLPE    | TFDLVDGE   | DFSSP                             | EVQFQEFVESYDTE                                       | VENKSPSNGML           | QNGFQMEAE     |
| mdo  | Malus domestica MDP0000551847              | VDN---VADLLPE    | TFDLVDGE   | DFSSP                             | EVQFQEFVESYDTE                                       | VENKSPSNGML           | QNGFQMEAE     |
| ppe  | Prunus persica ppa012883m                  | VDN---VADLLPE    | TFDLVDGE   | DFSSP                             | EVQFQEFVESYDTE                                       | VENKSPSNGML           | QNGFQMEAE     |
| fve  | Fragaria vesca mrna21941.1-vl.0-hybrid     | VDN---VADLLPE    | TFDLVDGE   | DFSSP                             | EVQFQEFVESYDTE                                       | VENKSPSNGML           | QNGFQMEAE     |
| csi  | Citrus sinensis orange1.1g031463m          | VDN---VADLLPE    | TFDLVDGE   | DFSSP                             | EVQFQEFVESYDTE                                       | VENKSPSNGML           | QNGFQMEAE     |
| ccl  | Citrus clementina Ciclev10006124m          | VDN---VADLLPE    | TFDLVDGE   | DFSSP                             | EVQFQEFVESYDTE                                       | VENKSPSNGML           | QNGFQMEAE     |
| csa  | Cucumis sativus Cucsa.004230.1             | VDN---VADLLPE    | TFDLVDGE   | DFSSP                             | EVQFQEFVESYDTE                                       | VENKSPSNGML           | QNGFQMEAE     |
| stu  | Solanum tuberosum PGSC0003DMP400052009     | ---AGNDVADLLPE   | NIDLNVDE   | DILNM                             | EAQFEELQSSSE                                         | DQGIKSSLYGVNAM        | POVGLP        |
| sly  | Solanum lycopersicum Solyc10g079820.1.1    | ---AGNDVADLLPE   | NIDLNVDE   | DILNM                             | EAQFEELQSSSE                                         | DQGIKSSLYGVNAM        | POVGLP        |
| stu  | Solanum tuberosum PGSC0003DMP400013490     | GFAGNDVADLLPE    | NIDLNVDE   | DILNM                             | EAQFEELQSSSE                                         | DQGIKSSLYGVNAM        | POVGLP        |
| sly  | Solanum lycopersicum Solyc04g017690.2.1    | GFAGNDVADLLPE    | NIDLNVDE   | DILNM                             | EAQFEELQSSSE                                         | DQGIKSSLYGVNAM        | POVGLP        |
| mgv  | Mimulus guttatus vl.1 mgvla015406m         | ---DDS---VUGLLPD | NIDLNVDE   | DILNM                             | EAQFEELQSSSE                                         | DQGIKSSLYGVNAM        | POVGLP        |
| mgv  | Mimulus guttatus vl.1 mgvla015076m         | ---DDS---VUGLLPD | NIDLNVDE   | DILNM                             | EAQFEELQSSSE                                         | DQGIKSSLYGVNAM        | POVGLP        |
| tca  | Theobroma cacao Thecc1EG019501t1           | ---DDADVADLLPE   | SFELGDE    | ELVDL                             | DAQFEELQSSSE                                         | DQGIKSSLYGVNAM        | POVGLP        |
| csi  | Citrus sinensis orange1.1g031370m          | DDYDSDLEDFEPP    | IVGADLSV   | ESK                               | ---EKNLSDFEKGRLVDTGTNG                               | ---VDAKALLKLNLSKPLKER | SPKER         |
| ccl  | Citrus clementina Ciclev100032949m         | DDYDSDLEDFEPP    | IVGADLSV   | ESK                               | ---EKNLSDFEKGRLVDTGTNG                               | ---VDAKALLKLNLSKPLKER | SPKER         |
| csa  | Cucumis sativus Cucsa.335550.1             | DDYDSDLEDFEPP    | IVGADLSV   | ESK                               | ---EKNLSDFEKGRLVDTGTNG                               | ---VDAKALLKLNLSKPLKER | SPKER         |
| vvi  | Vitis vinifera GSVIVT01000857001           | DDYDSDLEDFEPP    | IVGADLSV   | ESK                               | ---EKNLSDFEKGRLVDTGTNG                               | ---VDAKALLKLNLSKPLKER | SPKER         |
| pop  | Populus trichocarpa Potri.001G023100.1     | GDADDLTLTLLPE    | DLVDVGVE   | EFNLS                             | EAQFEEMVLAEEAEKTDPSATDPKVMKPLNGLVDVKAALLNDLNVPKSPKDR | ---                   | ---           |
| pop  | Populus trichocarpa Potri.003G020500.1     | GDADDLTLTLLPE    | DLVDVGVE   | EFNLS                             | EAQFEEMVLAEEAEKTDPSATDPKVMKPLNGLVDVKAALLNDLNVPKSPKDR | ---                   | ---           |
| mes  | Manihot esculenta cassava4.1_017967m       | SDDD---VVDLLPE   | KLDVGDE    | EFNLS                             | EAQFEEMVLAEEAEKTDPSATDPKVMKPLNGLVDVKAALLNDLNVPKSPKDR | ---                   | ---           |
| gmx  | Glycine max Glyma04g28560.1                | SSDD---IENMLSE   | TFDLGME    | DFNVL                             | ENEFQOLVMSFSEALDHSVQDDPNTGKGSPO                      | SLNKDVKAFLINLTPK      | SPRER         |
| gmx  | Glycine max Glyma19g20940.1                | STNDD---MENMLSE  | TFDLGME    | DFNVL                             | ENEFQOLVMSFSEALDHSVQDDPNTGKGSPO                      | SLNKDVKAFLINLTPK      | SPRER         |
| pvu  | Phaseolus vulgaris Phvul.005G033200.1      | STNDD---MENMLSE  | TFDLGME    | DFNVL                             | ENEFQOLVMSFSEALDHSVQDDPNTGKGSPO                      | SLNKDVKAFLINLTPK      | SPRER         |
| mtr  | Medicago truncatula Medtr3g023110.1        | ATNDD---IEHMLSE  | TFDLGME    | DFNVL                             | ENEFQOLVMSFSEALDHSVQDDPNTGKGSPO                      | SLNKDVKAFLINLTPK      | SPRER         |
| aco  | Aquilegia coerulea Aqua_014_00689.1        | GNEDDIDIANLLPD   | SIDL---DE  | DFONS                             | ---                                                  | ---                   | ---           |
| spo  | Spirodela polyrhiza v2_Spipo27G0016100     | YDEEDIDIANLLPD   | SIDL---DE  | DFONS                             | ---                                                  | ---                   | ---           |
| lus  | Linum usitatissimum Lus10019769            | IDLAADMTGTIAG    | DVKKPSVE   | SEKSNALNGL                        | ---IVD                                               | AKALLRDINQ            | ---SPTSPKGGSP |
| lus  | Linum usitatissimum Lus10016358            | IDLAADMTGTIAG    | DVKKPSVE   | SEKSNALNGL                        | ---IVD                                               | AKALLRDINQ            | ---SPTSPKGGSP |
| sbi  | Sorghum bicolor vl.4 Sb01g035250.1         | ---DAAGLLP---    | DEEDLFYDD  | LEQAPAAVDPA                       | ---PAAA                                              | ---                   | ---           |
| zma  | Zea mays GRMZM2G181551_T02                 | ---DAAGLLP---    | DEEDLFYDD  | LEQAPAAVDPA                       | ---PAAA                                              | ---                   | ---           |
| zma  | Zea mays GRMZM2G5845782_T02                | ---ELVALLAY---   | DEEDLFYDD  | LEQAPAAVDPA                       | ---PAAA                                              | ---                   | ---           |
| zma  | Zea mays GRMZM2G045178_T01                 | ---ELVALLAY---   | DEEDLFYDD  | LEQAPAAVDPA                       | ---PAAA                                              | ---                   | ---           |
| pvi  | Panicum virgatum vl.0 Pavirv00027437m      | ---DAAGLLP---    | DEEDLFYDD  | LEQAPAAVDPA                       | ---PAAA                                              | ---                   | ---           |
| pha  | Panicum hallii v0.5 Pahal.0073s0105.1      | ---DAAGLLP---    | DEEDLFYDD  | LEQAPAAVDPA                       | ---PAAA                                              | ---                   | ---           |
| pvi  | Panicum virgatum vl.0 Pavirv00024803m      | ---DAAGLLP---    | DEEDLFYDD  | LEQAPAAVDPA                       | ---PAAA                                              | ---                   | ---           |
| pvi  | Panicum virgatum vl.0 Pavirv00052978m      | ---DAAGLLP---    | DEEDLFYDD  | LEQAPAAVDPA                       | ---PAAA                                              | ---                   | ---           |
| bdi  | Brachypodium distachyon Bradi1g62300.1     | ED---DAAGLLP---  | DEEDLFYDD  | LEQAPAAVDPA                       | ---PAAA                                              | ---                   | ---           |
| sit  | Setaria italica Si037835m                  | ED---DAAGLLP---  | DEEDLFYDD  | LEQAPAAVDPA                       | ---PAAA                                              | ---                   | ---           |
| osa  | Oryza sativa LOC_Os03g23010.1              | AADDDDLAAGLLPD   | DDDDDLFFD  | ---QTHNLLVDP                      | ---PAAA                                              | ---                   | ---           |
| sbi  | Sorghum bicolor vl.4 Sb02g041980.1         | AADDDDLAAGLLPD   | DDDDDLFFD  | ---QTHNLLVDP                      | ---PAAA                                              | ---                   | ---           |
| zma  | Zea mays GRMZM2G327692_T01                 | AADDDDLAAGLLPD   | DDDDDLFFD  | ---QTHNLLVDP                      | ---PAAA                                              | ---                   | ---           |
| pvi  | Panicum virgatum vl.0 Pavirv00025393m      | ADAEIDVADLLPD    | DSVDLLDMV  | TDDLFFYAPDVHHQAKAPAP              | PGYD-LDVLRA                                          | LS                    | ---           |
| pvi  | Panicum virgatum vl.0 Pavirv00004900m      | DDADVDVADLLPD    | DSVDLLDMV  | TDDLFFYAPDVHHQAKAPAP              | PGYD-LDVLRA                                          | LS                    | ---           |
| pvi  | Panicum virgatum vl.0 Pavirv00068884m      | DDADVDVADLLPD    | DSVDLLDMV  | TDDLFFYAPDVHHQAKAPAP              | PGYD-LDVLRA                                          | LS                    | ---           |
| pha  | Panicum hallii v0.5 Pahal.0110s0059.1      | DDADVDVADLLPD    | DSVDLLDMV  | TDDLFFYAPDVHHQAKAPAP              | PGYD-LDVLRA                                          | LS                    | ---           |
| sit  | Setaria italica Si031348m                  | DDADVDVADLLPD    | DSVDLLDMV  | TDDLFFYAPDVHHQAKAPAP              | PGYD-LDVLRA                                          | LS                    | ---           |
| zma  | Zea mays GRMZM2G037189_T01                 | DDADVDVADLLPD    | DSVDLLDMV  | TDDLFFYAPDVHHQAKAPAP              | PGYD-LDVLRA                                          | LS                    | ---           |
| osa  | Oryza sativa LOC_Os07g46670.2              | VFDD-DLAALLPD    | DSVDLLDMV  | TDDLFFYAPDVHHQAKAPAP              | PGYD-LDVLRA                                          | LS                    | ---           |
| bdi  | Brachypodium distachyon Bradi1g18780.1     | EDBHDDIAALLPD    | LHDAADFLYS | PPPLFPQPHQPDLLHRYGPAAGFG          | GHGMDAVA                                             | ---                   | ---           |
