# Supplementary material for: Evolutionary history exposes radical diversification among classes of interaction partners of the MLLE domain of plant poly(A)-binding proteins
Source: BMC Evol Biol. 2015 Sep 16;15:195. doi: 10.1186/s12862-015-0475-1 (PMC4574140; doi:10.1186/s12862-015-0475-1)
Supplement: Additional file 7: — Protein sequence alignment for class C sequence LOGO #C8. The sequence alignments were performed using ClustalX 2.0.12; default colors were used. (PDF 14808 kb) [file 12862_2015_475_MOESM7_ESM.pdf]

# class C1

```

bra Brassica_rapa_Chifuu-401_v1.2_Bra007762
gra Gossypium_raimondii_Gorai.013G221300.1
aly Arabidopsis_lyrata_481487
aha Arabidopsis_halleri_v1.1_Araha.18606s0001.1
ath Arabidopsis_thaliana_CID7_AT2G26280
cru Capsella_rubella_Carubv10022901m
tha Thellungiella_haloophila_Thhalv10001942m
gmX Glycine_max_Glyma04g06010.1
tca Theobroma_cacao_Thecc1EG037409t1
gra Gossypium_raimondii_Gorai.009G039900.1
fve Fragaria_vesca_mrna15483.1-v1.0-hybrid
ppe Prunus_persica_ppa005506m
mdo Malus_domestica_MDP0000215517
mdo Malus_domestica_MDP0000238213
pvu Phaseolus_vulgaris_Phvul.001G044600.1
gmX Glycine_max_Glyma17g33510.3
gmX Glycine_max_Glyma14g12570.1
bra Brassica_rapa_Chifuu-401_v1.2_Bra034300
csa Cucumis_sativus_Cucsa.271150.1
mes Manihot_esculenta_cassava4.1_004279m
rcO Ricinus Communis_29739.m003641
pop Populus_trichocarpa_Potri.018G047700.1
pop Populus_trichocarpa_Potri.006G218900.1
csi Citrus_sinensis_orangel.1g045299m
ccl Citrus_clementina_Ciclev10007851m
aco Aquilegia_coerulea_Aqua_020_00514.1
stu Solanum_tuberosum_PGSC0003DMP400023014
sly Solanum_lycopersicum_Solyc08g061320.2.1
lus Linum_usitatissimum_Lus1038081
lus Linum_usitatissimum_Lus10009796
vvi Vitis_vinifera_GSVIVT01035490001
mgu Mimulus_guttatus_v1.1_mgvla003899m
mgu Mimulus_guttatus_v1.1_mgvla004956m
smo Selaginella_moellendorffii_438708
ppp Physcomitrella_patens_Ppls159_78V6.1
egr Eucalyptus_grandis_Eucgr.C00743.1
pvu Phaseolus_vulgaris_Phvul.009G083600.1
gmX Glycine_max_Glyma06g06030.3
sbi Sorghum_bicolor_Sb10g006500.1
zma Zea_mays_GRMZM2G392700_T01
pvi Panicum_virgatum_v0.0_Pavirv00004500m
pvi Panicum_virgatum_v0.0_Pavirv00013281m
pha Panicum_hallii_v0.5_Pahal.0567s0004.1
sit Setaria_italica_si006223m
osa Oriza_sativa_LOC_Os06g09890.2
atr Amborella_trichopoda_scaffold00024.310
bdi Brachypodium_distachyon_Bradil146550.1
gra Gossypium_raimondii_Gorai.004G286100.1
mes Manihot_esculenta_cassava4.1_000207m
zma Zea_mays_GRMZM5G830874_T05
pha Panicum_hallii_v0.5_Pahal.0027s0212.1
osa Oriza_sativa_LOC_Os03g08270.3
zma Zea_mays_GRMZM2G017254_T02

```

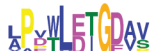[illegible]

# class C2

```

aly Arabidopsis_lyrata_487980
aha Arabidopsis_halleri_v1.1 Araha.7834s0002.1
ath Arabidopsis_thaliana CID5_AT5G25540
cru Capsella_rubella_Carubv10003307m
tha Thellungiella_halophila Thhalv10014836m
bra Brassica_rapa_Chiifu-401_v1.2_Bra008962
bra Brassica_rapa_Chiifu-401_v1.2_Bra023325
lus Linum_usitatissimum Lus10021960
lus Linum_usitatissimum Lus10041253
aly Arabidopsis_lyrata_910614
aha Arabidopsis_halleri_v1.1 Araha.26860s0006.1
ath Arabidopsis_thaliana CID6_AT5G11440
cru Capsella_rubella_Carubv10001953m
bra Brassica_rapa_Chiifu-401_v1.2_Bra009849
tha Thellungiella_halophila Thhalv10004997m
bra Brassica_rapa_Chiifu-401_v1.2_Bra020506
aco Aquilegia_coerulea Aluca_001_00608.1
cpa Carica_papaya_evm.model.supercontig_91.6
pop Populus_trichocarpa_Potri.006G246600.1
tca Theobroma_cacao Thecc1EG038301t1
ccl Citrus_clementina Ciclev10009480m
csi Citrus_sinensis_orangel.1g029518m
fve Fragaria_vesca_mrna01046.1-v1.0-hybrid
ppe Prunus_persica_ppa011982m
mdo Malus_domestica MDP0000143969
mdo Malus_domestica MDP0000406339
rcu Ricinus communis 29794.m003489
mes Manihot_esculenta_cassava4.1_016762m
mgu Mimulus_guttatus_v1.1_mgv1a014360m
mes Manihot_esculenta_cassava4.1_016472m
gra Gossypium_raidmondii_Gorai.008G052900.1
gra Gossypium_raidmondii_Gorai.004G151900.1
csa Cucumis_sativus Cucsa.310610.1
gmx Glycine_max_Glyma06g07720.1
stu Solanum_tuberosum PGSC0003DMP400056115
sly Solanum_lycopersicum SolyC08g067810.2.1
vvi Vitis_vinifera_GSVIVT01015440001
gmx Glycine_max_Glyma17g30230.4
gmx Glycine_max_Glyma14g16200.4
pvu Phaseolus_vulgaris_Phvu1.001G055700.1
egr Eucalyptus_grandis_Eucgr.C01818.1
atr Amborella_trichopoda scaffold00142.61

```

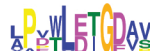

LPETLTDIGDIS  
LPETLTDIGDIS  
LPETLTDIGDIS  
LPETLTDIGDIS  
LPETLTDIGDIS  
LPETLDIGVMC  
LPETLDIGDL  
LPETLEIGDVPV  
LPETLEIGDVPV  
LPETLDIGDVPV  
LPETLDIGDVPV  
LPETLDIGDVPV  
LPETLDIGDVPV  
LPETLDIGDVPV  
LPETLDIGDVPV  
LPETLDIGDVY  
LPETLDIGDVS  
LPETLDIGDVS  
LPETLDIGDVS  
LPETLDIGDVS  
LPETLDIGDVS  
LPETLDIGDVS  
LPETLDIGDVS  
LPETLDIGDVS  
LPETLDIGDIS  
LPETLDIGDIS  
LPETLDIGDIS  
--KELDIGSVS  
LPESLDIGDVS  
LPESLDIGDVS  
LPESLDIGDVS  
LPETLDIGDVS  
LPETLDIGDVS  
LPETLDIGDVS  
LPETLAISGTS
